# Supplementary material for: Measurement report: Long-term measurements of ozone concentrations in semi-natural African ecosystems
Source: Copernicus journal article supplement (doi:10.5194/egusphere-2024-284), 2024-04-16
Supplement: Supplementary file [file egusphere-2024-284-AC1-supplement.pdf]

## Response to Comment CC1

Title: Long-term measurement of ozone concentrations in semi-natural African ecosystems

Author(s): Donnou et al.

MS No.: acp-2024-284

The authors would like to thank Erika von Schneidemesser for its relevant and helpful comments to improve the manuscript and give more informations about passive samplers monitoring.

**Comment 1** : Table 2: It would be more helpful if instead of the absolute numbers listed for data collection efficiency, a % was given, plus the n-value for total samples. This makes it more comparable across sites regardless of the n-value.

We will propose in the review process to include in the manuscript a modified table 2 as follow:

| Ecosystem                  | Station | Sampling period | Detection limit (ppb) | Data collection efficiency (%) | Total of samplers                          | Season                                                               | Measurement altitude (m) |
|----------------------------|---------|-----------------|-----------------------|--------------------------------|--------------------------------------------|----------------------------------------------------------------------|--------------------------|
| Dry savanna                | Ba      | 2000-2020       | 0.1                   | 93.5                           | 248                                        | Dry season: Oct-May<br>Wet season: Jun-Sep                           | 1.5                      |
|                            | Ka      | 2001-2020       |                       | 86.7                           | 240                                        |                                                                      |                          |
|                            | Ag      | 2005-2018       |                       | 82.6                           | 132                                        |                                                                      |                          |
|                            | Bb      | 2016-2020       |                       | 94                             | 50                                         |                                                                      |                          |
|                            | Da      | 2012-2020       |                       | 83.7                           | 104                                        |                                                                      |                          |
| Wet savanna                | La      | 2001-2020       |                       | 94.2                           | 240                                        | Dry season: Nov-Mar<br>Wet season: Apr-Oct                           | 1.5                      |
|                            | Dj      | 2005-2020       |                       | 92.5                           | 186                                        |                                                                      |                          |
| Forest                     | Zo      | 2001-2020       |                       | 86.7                           | 240                                        | Dry season: Dec-Fev and July-Aug<br>Wet season: Mar-Jun and Sept-Nov | 3                        |
|                            | Bo      | 2001-2020       |                       | 68.3                           | 240                                        |                                                                      |                          |
| Agricultural field         | Mb      | 2017-2020       |                       | 95.3                           | 43                                         | Dry season: Jun-Oct and Jan-Fev<br>Wet season: Mar-May and Nov-Dec   | 1.5                      |
| Regional savanna/semi-arid | LT      | 1995-2015       | 95.2                  | 248                            | Dry season: Apr-Sep<br>Wet season: Oct-Mar | 1.5                                                                  |                          |
|                            | Sk      | 2000-2015       | 86                    | 192                            |                                            |                                                                      |                          |
|                            | Af      | 1997-2015       | 85.5                  | 221                            |                                            |                                                                      |                          |
|                            | CP      | 1995-2020       | 90.7                  | 248                            | Dry season: Oct-Mar<br>Wet season: Apr-Sep |                                                                      |                          |

**Comment 2** : section 2.2. while the method for passive ozone sampling is well established, it would still be important to include text on the number of blanks that were evaluated and if/how any blank correction was done. Also, while monthly is mentioned, it is not explicit if the samples were all monthly and did this correspond to calendar months or were there different start and end dates for sampling rather than the first of the month - last day of the month? Finally, were these sampling times coordinated across the sites or did they vary?

We will add mentions in the revised text section 2.2 to answer the comment including these informations:

Sampling periods at the measurement sites were coordinated and passive samplers are exposed on a monthly basis using the calendar months. One blank dedicated to ozone is included in the expedition of samplers each two months on sites. In this way, the delay between field deployment and analysis are the same both blanks and exposed samples. All data presented in this paper are blank corrected.
